# Supplementary material for: LncRNA EGFR‑AS1 promotes lung cancer cell proliferation, invasion and metastasis via regulation of miR‑449a/HDAC1
Source: PubMed Central journal article supplement — Exp Ther Med. 2024 Dec 3;29(2):27. doi: 10.3892/etm.2024.12777 (PMC11667440; doi:10.3892/etm.2024.12777), 2024-12-03

Figure S1. miR-449a inhibitor inhibits the expression of miR-449a in A549 and PC9. Quantification of the miR-449a expression during the transfection of miR-449a inhibitor to (A) A549 and (B) PC9 cells. mRNA. miR, microRNA.

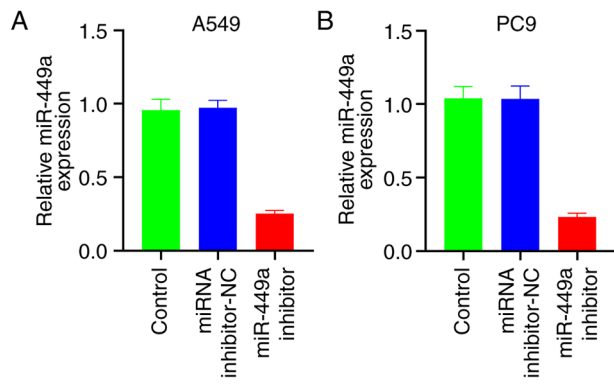

Supplement: Supplementary_Data.pdf [file Supplementary_Data.pdf]
